# Supplementary material for: Intestinal epithelial MyD88 is a sensor switching host metabolism towards obesity according to nutritional status
Source: PubMed Central journal article supplement (PMC4268705; doi:10.1038/ncomms6648), 2014-12-05
Supplement: ncomms6648-s1.pdf [file ncomms6648-s1.pdf]

## Supplementary Figures and Tables

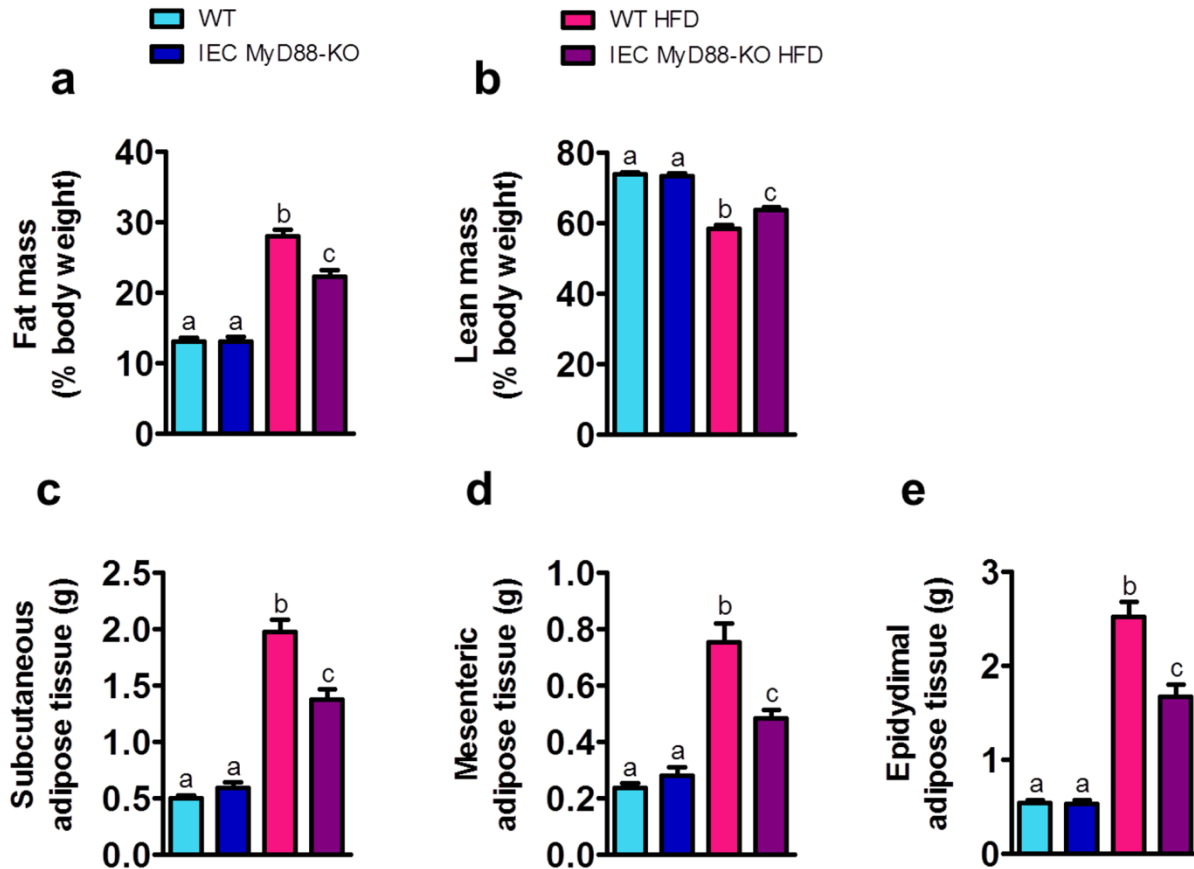

**Supplementary Figure 1. Intestinal epithelial MyD88 deletion decreases fat mass under HFD.** (a) Final fat mass expressed as a percentage of final body weight (n=25). (b) Final lean mass expressed as a percentage of the final body weight (n=25). Subcutaneous (c), mesenteric (d) and epididymal (e) fat depot weights (g). These data correspond to the results of three independent experiments. All the replicates represent biological replicates. Data are shown as the means  $\pm$  s.e.m. Data with different superscript letters are significantly different ( $P < 0.05$ ) according to the ANOVA one-way statistical analysis followed by Newman-Keuls post hoc tests after normalization by Log transformation.

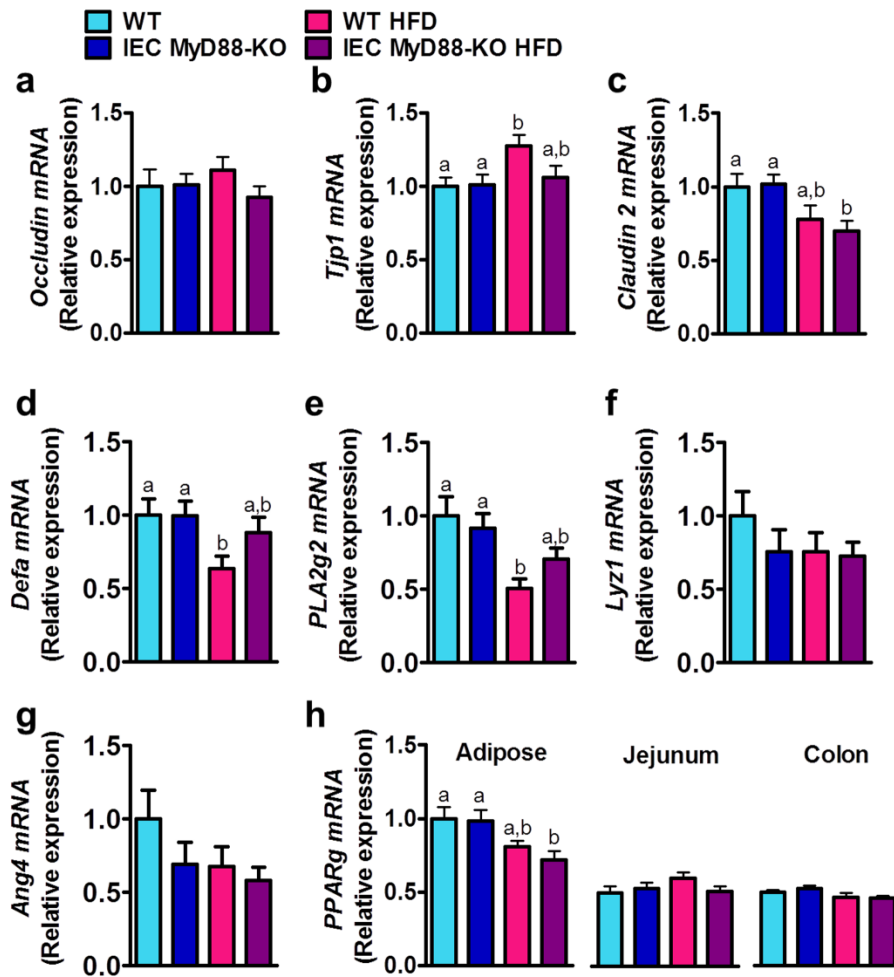

**Supplementary Figure 2. Expression of *Occludin*, *Tjp-1*, *Claudin 2*, *Defa*, *PLA2g2*, *Lyz1*, *Ang4*, and *PPARg*.** (a) Occludin mRNA expression (encoded by *occludin*) (n=10), (b) zonula occludens 1 (*Tjp-1*) mRNA expression (encoded by *ZO-1*) (n=10), (c) claudin 2 mRNA expression (encoded by *claudin 2*) (n=10) (d)  $\alpha$ -defensins mRNA expression (encoded by *Defa*) (n=10), (e) Phospholipase A2 group IIA mRNA expression (encoded by *Pla2g2a*) (n=10), (f) Lysozyme C mRNA expression (encoded by *Lyz1*) (n=10) and (g) Angiogenin 4 mRNA expression (encoded by *Ang4*) (n=10) measured by RT-qPCR in the jejunum of mice. (h) Peroxisome proliferator-activated receptor gamma (*PPARg*) measured by RT-qPCR in the adipose tissue, jejunum and colon of mice (n=10). These data correspond to the results of one experiment. All the replicates represent biological replicates. Data are shown as the means  $\pm$  s.e.m. Data with different superscript letters are significantly different ( $P < 0.05$ ) according to the ANOVA one-way statistical analysis followed by Newman-Keuls post hoc tests after normalization by Log transformation.

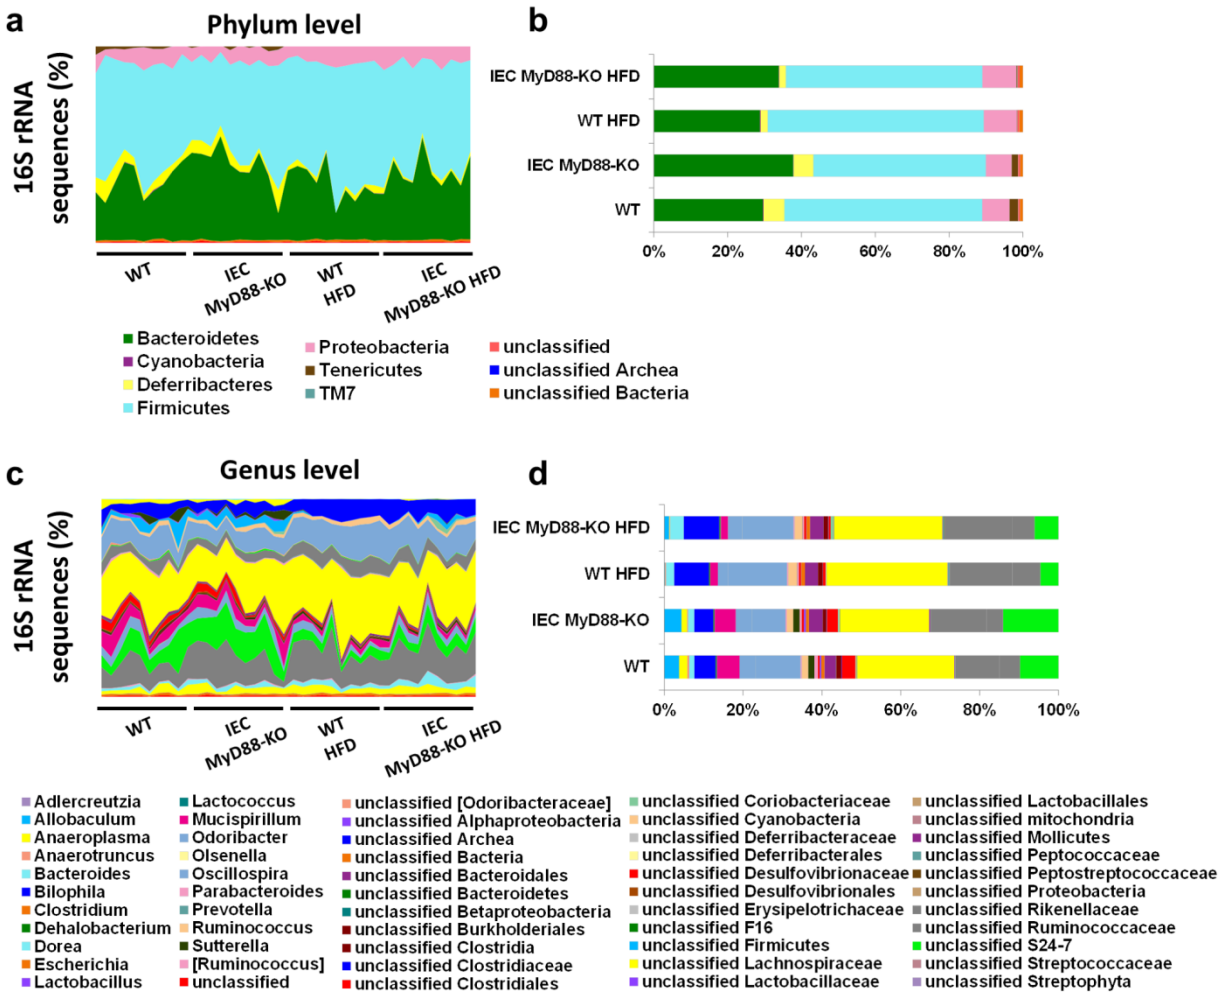

**Supplementary Figure 3. Intestinal MyD88 deletion affects gut bacterial community analyzed by 16S rRNA high-throughput sequencing.** (a) Relative abundances (percentage of 16S rRNA sequences) of the different bacterial phyla in each sample among the WT, IEC MyD88-KO, WT HFD and IEC MyD88-KO HFD mice (n=10). (b) Percentage of each community contributed by the indicated phylum (n=10). (c) Relative abundances (percentage of 16S rRNA sequences) of the different bacterial genera in each sample among the WT, IEC MyD88-KO, WT HFD and IEC MyD88-KO HFD mice (n=10). (d) Percentage of each community contributed by the indicated genus (n=10). In all the figures the different phyla and genera are represented by different color codes. These data correspond to the results of one experiment. All the replicates represent biological replicates.

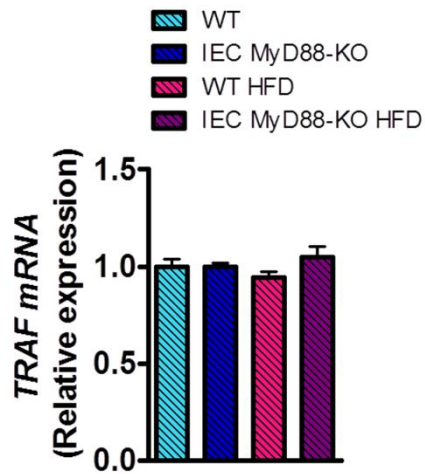

**Supplementary Figure 4. Therapeutic effect of intestinal MyD88 deletion observed in obese and type 2 diabetic mice.** *TRAF* mRNA measured in the colon at the end of the experiment (n=10). These data correspond to the results of one experiment. All the replicates represent biological replicates. Data are shown as the means  $\pm$  s.e.m. Data with different superscript letters are significantly different ( $P < 0.05$ ) according to the ANOVA one-way statistical analysis followed by Newman-Keuls post hoc tests after normalization by Log transformation.

**Supplementary Table 1:** Relative abundance of the bacterial phyla found in the different groups (% of 16S rRNA sequences)

|                       | WT    |      | IEC MyD88-KO |      | changes (%) | p-value |
|-----------------------|-------|------|--------------|------|-------------|---------|
|                       | Mean  | SEM  | Mean         | SEM  |             |         |
| Actinobacteria        | 0,13  | 0,08 | 0,34         | 0,15 | 151,89      | 0,24962 |
| Bacteroidetes         | 29,94 | 2,51 | 38,22        | 3,40 | 27,65       | 0,06586 |
| Cyanobacteria         | 0,00  | 0,00 | 0,00         | 0,00 | -42,48      | 0,65350 |
| Deferribacteres       | 5,62  | 0,85 | 5,25         | 0,90 | -6,56       | 0,76811 |
| Firmicutes            | 52,06 | 2,11 | 45,27        | 2,46 | -13,04      | 0,05067 |
| Proteobacteria        | 7,13  | 0,86 | 6,79         | 0,55 | -4,80       | 0,73960 |
| Tenericutes           | 2,15  | 0,44 | 1,40         | 0,34 | -34,94      | 0,19231 |
| TM7                   | 0,07  | 0,01 | 0,06         | 0,01 | -18,97      | 0,52643 |
| Unclassified          | 0,50  | 0,07 | 0,57         | 0,05 | 15,14       | 0,35580 |
| unclassified Bacteria | 2,39  | 0,12 | 2,10         | 0,18 | -12,27      | 0,18891 |

|                       | WT    |      | WT HFD |      | changes (%) | p-value |
|-----------------------|-------|------|--------|------|-------------|---------|
|                       | Mean  | SEM  | Mean   | SEM  |             |         |
| Actinobacteria        | 0,13  | 0,08 | 0,04   | 0,01 | -71,07      | 0,22517 |
| Bacteroidetes         | 29,94 | 2,51 | 29,25  | 2,95 | -2,31       | 0,86032 |
| Cyanobacteria         | 0,00  | 0,00 | 0,01   | 0,01 | 378,28      | 0,26689 |
| Deferribacteres       | 5,62  | 0,85 | 1,94   | 0,39 | -65,41      | 0,00094 |
| Firmicutes            | 52,06 | 2,11 | 57,12  | 2,61 | 9,71        | 0,14947 |
| Proteobacteria        | 7,13  | 0,86 | 8,75   | 0,54 | 22,75       | 0,12591 |
| Tenericutes           | 2,15  | 0,44 | 0,01   | 0,01 | -99,36      | 0,00013 |
| TM7                   | 0,07  | 0,01 | 0,03   | 0,01 | -52,36      | 0,05468 |
| Unclassified          | 0,50  | 0,07 | 0,48   | 0,04 | -4,14       | 0,79150 |
| unclassified Bacteria | 2,39  | 0,12 | 2,36   | 0,25 | -1,23       | 0,91611 |

|                       | IEC MyD88-KO |      |       |      |             |         |
|-----------------------|--------------|------|-------|------|-------------|---------|
|                       | WT HFD       |      |       | HFD  |             |         |
|                       | Mean         | SEM  | Mean  | SEM  | changes (%) | p-value |
| Actinobacteria        | 0,01         | 0,01 | 0,71  | 0,37 | 1727,84     | 0,08552 |
| Bacteroidetes         | 29,25        | 2,95 | 34,90 | 2,77 | 19,30       | 0,18011 |
| Cyanobacteria         | 0,03         | 0,01 | 0,03  | 0,02 | 131,95      | 0,55076 |
| Deferribacteres       | 0,01         | 0,01 | 1,71  | 0,21 | -12,17      | 0,59917 |
| Firmicutes            | 0,04         | 0,01 | 50,99 | 2,27 | -10,73      | 0,09286 |
| Proteobacteria        | 1,94         | 0,39 | 8,56  | 0,80 | -2,16       | 0,84616 |
| Tenericutes           | 57,12        | 2,61 | 0,14  | 0,07 | 933,24      | 0,09244 |
| TM7                   | 8,75         | 0,54 | 0,07  | 0,04 | 99,46       | 0,44034 |
| unclassified          | 2,36         | 0,25 | 0,51  | 0,05 | 7,32        | 0,60274 |
| unclassified Bacteria | 0,48         | 0,04 | 2,39  | 0,23 | 1,13        | 0,93842 |

All the phyla detected by pyrosequencing are presented in the tables. P-values are based on Student *t*-test. Student *t*-test results were corrected by an FDR test according to the Benjamini-Hochberg procedure, with an  $\alpha$  of < 0.05.

**Supplementary Table 2:** Relative abundance of the bacterial families found in the different groups (% of 16S rRNA sequences)

|                              | WT     |       | IEC MyD88-KO |       | changes (%)  | p-value        |
|------------------------------|--------|-------|--------------|-------|--------------|----------------|
|                              | Mean   | SEM   | Mean         | SEM   |              |                |
| <i>Alcaligenaceae</i>        | 1,528  | 0,731 | 1,627        | 0,521 | 6,47         | 0,91354        |
| <i>Anaeroplasmataceae</i>    | 2,151  | 0,442 | 1,400        | 0,336 | -34,89       | 0,19319        |
| <i>Bacteroidaceae</i>        | 1,318  | 0,169 | 1,605        | 0,263 | 21,76        | 0,37042        |
| <i>Chloroplast</i>           | 0,002  | 0,002 | 0,001        | 0,001 | -42,48       | 0,65350        |
| <i>Clostridiaceae</i>        | 0,013  | 0,010 | 0,003        | 0,002 | -77,65       | 0,34955        |
| <i>Coriobacteriaceae</i>     | 0,135  | 0,075 | 0,339        | 0,155 | 151,89       | 0,24962        |
| <i>Deferribacteraceae</i>    | 5,617  | 0,845 | 5,249        | 0,895 | -6,56        | 0,76811        |
| <i>Desulfovibrionaceae</i>   | 5,230  | 0,649 | 4,662        | 0,619 | -10,86       | 0,53435        |
| <i>Erysipelotrichaceae</i>   | 3,900  | 1,131 | 4,465        | 0,487 | 14,47        | 0,65220        |
| <i>Incertae Sedis XIII</i>   | 0,109  | 0,028 | 0,091        | 0,013 | -16,16       | 0,58190        |
| <i>Incertae Sedis XIV</i>    | 0,001  | 0,001 | 0,000        | 0,000 | WT           | 0,33056        |
| <i>Lachnospiraceae</i>       | 22,792 | 1,483 | 20,488       | 1,782 | -10,11       | 0,33353        |
| <i>Lactobacillaceae</i>      | 0,120  | 0,029 | 0,065        | 0,021 | -46,32       | 0,14159        |
| <i>Porphyromonadaceae</i>    | 11,702 | 1,239 | 14,866       | 1,216 | 27,03        | 0,08511        |
| <i>Prevotellaceae</i>        | 0,016  | 0,014 | 0,000        | 0,000 | WT           | 0,26360        |
| <i>Rikenellaceae</i>         | 11,380 | 1,191 | 14,509       | 2,064 | 27,49        | 0,20578        |
| <i>Ruminococcaceae</i>       | 18,036 | 1,377 | 13,974       | 0,779 | -22,52       | <b>0,01940</b> |
| <i>Streptococcaceae</i>      | 0,002  | 0,001 | 0,003        | 0,002 | 19,90        | 0,85406        |
| <i>TM7</i>                   | 0,070  | 0,015 | 0,057        | 0,014 | -18,97       | 0,52643        |
| <i>u "Bacteroidales"</i>     | 4,005  | 0,431 | 5,510        | 0,376 | 37,56        | <b>0,01702</b> |
| <i>u "Bacteroidetes"</i>     | 1,519  | 0,226 | 1,733        | 0,133 | 14,06        | 0,42615        |
| <i>u "Clostridia"</i>        | 0,362  | 0,057 | 0,242        | 0,050 | -32,99       | 0,13418        |
| <i>u "Firmicutes"</i>        | 1,958  | 0,147 | 1,722        | 0,234 | -12,06       | 0,40432        |
| <i>u "Proteobacteria"</i>    | 0,124  | 0,054 | 0,174        | 0,045 | 40,03        | 0,48661        |
| <i>u Alphaproteobacteria</i> | 0,247  | 0,113 | 0,320        | 0,082 | 29,58        | 0,60587        |
| <i>u Bacteria</i>            | 2,392  | 0,120 | 2,099        | 0,178 | -12,27       | 0,18891        |
| <i>u Burkholderiales</i>     | 0,000  | 0,000 | 0,002        | 0,001 | IEC MyD88-KO | 0,15575        |
| <i>u Clostridiales</i>       | 4,768  | 0,464 | 4,220        | 0,487 | -11,50       | 0,42589        |
| <i>u Desulfovibrionales</i>  | 0,001  | 0,001 | 0,003        | 0,002 | 226,32       | 0,27844        |
| <i>u Mollicutes</i>          | 0,001  | 0,001 | 0,000        | 0,000 | WT           | 0,16487        |
| <i>Unclassified</i>          | 0,498  | 0,066 | 0,574        | 0,045 | 15,14        | 0,35580        |

FDR: non-significant.

|                              | WT     |       | WT HFD |       | changes (%) | p-value  |
|------------------------------|--------|-------|--------|-------|-------------|----------|
|                              | Mean   | SEM   | Mean   | SEM   |             |          |
| <i>Alcaligenaceae</i>        | 1,528  | 0,731 | 0,063  | 0,051 | -95,85      | 0,06092  |
| <i>Anaeroplasmataceae</i>    | 2,151  | 0,442 | 0,013  | 0,007 | -99,40      | 0,00013* |
| <i>Bacteroidaceae</i>        | 1,318  | 0,169 | 2,024  | 0,213 | 53,58       | 0,01819  |
| <i>Chloroplast</i>           | 0,002  | 0,002 | 0,011  | 0,007 | 378,28      | 0,26689  |
| <i>Clostridiaceae</i>        | 0,013  | 0,010 | 0,000  | 0,000 | WT          | 0,22358  |
| <i>Coriobacteriaceae</i>     | 0,135  | 0,075 | 0,039  | 0,012 | -71,07      | 0,22517  |
| <i>Deferribacteraceae</i>    | 5,617  | 0,845 | 1,943  | 0,390 | -65,41      | 0,00094* |
| <i>Desulfovibrionaceae</i>   | 5,230  | 0,649 | 8,612  | 0,591 | 64,66       | 0,00116* |
| <i>Enterobacteriaceae</i>    | 0,000  | 0,000 | 0,007  | 0,003 | WT HFD      | 0,02626  |
| <i>Erysipelotrichaceae</i>   | 3,900  | 1,131 | 0,187  | 0,095 | -95,21      | 0,00424* |
| <i>Incertae Sedis XIII</i>   | 0,109  | 0,028 | 0,041  | 0,005 | -62,61      | 0,03006  |
| <i>Incertae Sedis XIV</i>    | 0,001  | 0,001 | 0,001  | 0,001 | -0,42       | 0,99765  |
| <i>Lachnospiraceae</i>       | 22,792 | 1,483 | 25,612 | 2,457 | 12,37       | 0,33889  |
| <i>Lactobacillaceae</i>      | 0,120  | 0,029 | 0,029  | 0,011 | -75,75      | 0,00963* |
| <i>Peptococcaceae</i>        | 0,000  | 0,000 | 0,001  | 0,001 | WT HFD      | 0,15293  |
| <i>Peptostreptococcaceae</i> | 0,000  | 0,000 | 0,035  | 0,012 | WT HFD      | 0,00714* |
| <i>Porphyromonadaceae</i>    | 11,702 | 1,239 | 5,741  | 0,692 | -50,94      | 0,00054* |
| <i>Prevotellaceae</i>        | 0,016  | 0,014 | 0,051  | 0,020 | 213,52      | 0,17635  |
| <i>Rikenellaceae</i>         | 11,380 | 1,191 | 16,333 | 1,695 | 43,52       | 0,02796  |
| <i>Ruminococcaceae</i>       | 18,036 | 1,377 | 23,710 | 1,238 | 31,46       | 0,00669* |
| <i>Streptococcaceae</i>      | 0,002  | 0,001 | 0,006  | 0,002 | 178,14      | 0,15706  |
| <i>TM7</i>                   | 0,070  | 0,015 | 0,033  | 0,010 | -52,36      | 0,05468  |
| <i>u "Bacteroidales"</i>     | 4,005  | 0,431 | 3,874  | 0,453 | -3,29       | 0,83570  |
| <i>u "Bacteroidetes"</i>     | 1,519  | 0,226 | 1,227  | 0,129 | -19,22      | 0,27691  |
| <i>u "Clostridia"</i>        | 0,362  | 0,057 | 0,126  | 0,024 | -65,12      | 0,00130* |
| <i>u "Firmicutes"</i>        | 1,958  | 0,147 | 2,443  | 0,388 | 24,77       | 0,25767  |
| <i>u "Proteobacteria"</i>    | 0,124  | 0,054 | 0,023  | 0,009 | -81,90      | 0,07839  |
| <i>u Alphaproteobacteria</i> | 0,247  | 0,113 | 0,046  | 0,019 | -81,36      | 0,09536  |
| <i>u Bacteria</i>            | 2,392  | 0,120 | 2,363  | 0,248 | -1,23       | 0,91607  |
| <i>u Burkholderiales</i>     | 0,000  | 0,000 | 0,000  | 0,000 | WT HFD      |          |
| <i>u Clostridiales</i>       | 4,768  | 0,464 | 4,925  | 0,280 | 3,29        | 0,77567  |
| <i>u Desulfovibrionales</i>  | 0,001  | 0,001 | 0,001  | 0,001 | 31,51       | 0,81634  |
| <i>u Mollicutes</i>          | 0,001  | 0,001 | 0,001  | 0,001 | -41,90      | 0,64804  |
| <i>Unclassified</i>          | 0,498  | 0,066 | 0,478  | 0,040 | -4,14       | 0,79147  |

\*: significant p-values after FDR correction.

| IEC MyD88-KO                 |        |      |       |      |                  |                |
|------------------------------|--------|------|-------|------|------------------|----------------|
|                              | WT HFD |      | HFD   |      |                  |                |
|                              | Mean   | SEM  | Mean  | SEM  | changes (%)      | p-value        |
| <i>Alcaligenaceae</i>        | 0,06   | 0,05 | 0,12  | 0,06 | 84,85            | 0,51937        |
| <i>Anaeroplasmataceae</i>    | 0,01   | 0,01 | 0,14  | 0,07 | 996,67           | 0,09163        |
| <i>Bacteroidaceae</i>        | 2,02   | 0,21 | 3,23  | 0,52 | 59,84            | <b>0,04638</b> |
| <i>Chloroplast</i>           | 0,01   | 0,01 | 0,03  | 0,02 | 131,95           | 0,55076        |
| <i>Clostridiaceae</i>        | 0,00   | 0,00 | 0,01  | 0,00 | IEC MyD88-KO HFD | 0,05148        |
| <i>Coriobacteriaceae</i>     | 0,04   | 0,01 | 0,71  | 0,37 | 1727,85          | 0,08552        |
| <i>Deferribacteraceae</i>    | 1,94   | 0,39 | 1,71  | 0,21 | -12,17           | 0,59918        |
| <i>Desulfovibrionaceae</i>   | 8,61   | 0,59 | 8,37  | 0,79 | -2,78            | 0,81155        |
| <i>Enterobacteriaceae</i>    | 0,01   | 0,00 | 0,01  | 0,01 | 62,54            | 0,58657        |
| <i>Erysipelotrichaceae</i>   | 0,19   | 0,10 | 1,12  | 0,33 | 500,20           | <b>0,01359</b> |
| <i>Incertae Sedis XIII</i>   | 0,04   | 0,01 | 0,08  | 0,02 | 97,96            | <b>0,03597</b> |
| <i>Incertae Sedis XIV</i>    | 0,00   | 0,00 | 0,00  | 0,00 | WT HFD           | 0,33056        |
| <i>Lachnospiraceae</i>       | 25,61  | 2,46 | 24,52 | 1,73 | -4,25            | 0,72170        |
| <i>Lactobacillaceae</i>      | 0,03   | 0,01 | 0,07  | 0,02 | 133,91           | 0,09718        |
| <i>Peptococcaceae</i>        | 0,00   | 0,00 | 0,00  | 0,00 | 74,07            | 0,58792        |
| <i>Peptostreptococcaceae</i> | 0,04   | 0,01 | 0,12  | 0,06 | 250,81           | 0,17726        |
| <i>Porphyromonadaceae</i>    | 5,74   | 0,69 | 7,01  | 0,59 | 22,19            | 0,17904        |
| <i>Prevotellaceae</i>        | 0,05   | 0,02 | 0,03  | 0,01 | -49,00           | 0,28999        |
| <i>Rikenellaceae</i>         | 16,33  | 1,69 | 18,59 | 1,36 | 13,84            | 0,31235        |
| <i>Ruminococcaceae</i>       | 23,71  | 1,24 | 19,12 | 1,50 | -19,37           | <b>0,02992</b> |
| <i>Streptococcaceae</i>      | 0,01   | 0,00 | 0,01  | 0,00 | 35,40            | 0,48599        |
| <i>TM7</i>                   | 0,03   | 0,01 | 0,07  | 0,04 | 99,46            | 0,44034        |
| <i>u "Bacteroidales"</i>     | 3,87   | 0,45 | 4,76  | 0,43 | 22,76            | 0,17453        |
| <i>u "Bacteroidetes"</i>     | 1,23   | 0,13 | 1,27  | 0,11 | 3,61             | 0,79786        |
| <i>u "Clostridia"</i>        | 0,13   | 0,02 | 0,07  | 0,01 | -48,09           | <b>0,02826</b> |
| <i>u "Firmicutes"</i>        | 2,44   | 0,39 | 1,15  | 0,12 | -52,75           | <b>0,00540</b> |
| <i>u "Proteobacteria"</i>    | 0,02   | 0,01 | 0,03  | 0,01 | 34,50            | 0,56704        |
| <i>u Alphaproteobacteria</i> | 0,05   | 0,02 | 0,03  | 0,01 | -34,00           | 0,49409        |
| <i>u Bacteria</i>            | 2,36   | 0,25 | 2,39  | 0,23 | 1,13             | 0,93839        |
| <i>u Clostridiales</i>       | 4,92   | 0,28 | 4,71  | 0,45 | -4,37            | 0,68821        |
| <i>u Desulfovibrionales</i>  | 0,00   | 0,00 | 0,00  | 0,00 | 15,20            | 0,88838        |
| <i>u Mollicutes</i>          | 0,00   | 0,00 | 0,00  | 0,00 | -17,79           | 0,89222        |
| <i>Unclassified</i>          | 0,48   | 0,04 | 0,51  | 0,05 | 7,32             | 0,60271        |

All the families detected by pyrosequencing are presented in the tables. Indication WT, IEC MyD88-KO, WT HFD or IEC MyD88-KO HFD in the column 'changes (%)' corresponds to the group of mice for which the given phylotype was found exclusively. P-values are based on Student *t*-test.

u=unclassified

FDR: non-significant.



Supplementary Table 3: Relative abundance of bacterial genera found in the different groups (% of 16S rRNA sequences)

|                                  | WT     |       | IEC MyD88-KO |       | changes (%)  | p-value |
|----------------------------------|--------|-------|--------------|-------|--------------|---------|
|                                  | Mean   | SEM   | Mean         | SEM   |              |         |
| <i>Alistipes</i>                 | 11,374 | 1,192 | 14,505       | 2,064 | 27,52        | 0,20561 |
| <i>Allobaculum</i>               | 3,292  | 0,957 | 3,812        | 0,421 | 15,80        | 0,62494 |
| <i>Anaeroplasma</i>              | 2,151  | 0,442 | 1,400        | 0,336 | -34,89       | 0,19319 |
| <i>Anaerostipes</i>              | 0,001  | 0,001 | 0,000        | 0,000 | WT           | 0,16487 |
| <i>Anaerotruncus</i>             | 0,742  | 0,100 | 0,460        | 0,116 | -38,08       | 0,08181 |
| <i>Anaerovorax</i>               | 0,109  | 0,028 | 0,091        | 0,013 | -16,16       | 0,58190 |
| <i>Asaccharobacter</i>           | 0,013  | 0,006 | 0,008        | 0,004 | -38,06       | 0,51239 |
| <i>Bacteroides</i>               | 1,318  | 0,169 | 1,605        | 0,263 | 21,76        | 0,37042 |
| <i>Barnesiella</i>               | 0,004  | 0,002 | 0,010        | 0,004 | 179,98       | 0,17593 |
| <i>Blautia</i>                   | 0,001  | 0,001 | 0,000        | 0,000 | WT           | 0,33056 |
| <i>Butyricoccus</i>              | 0,046  | 0,007 | 0,033        | 0,008 | -29,62       | 0,22342 |
| <i>Butyrivibrio</i>              | 0,186  | 0,058 | 0,087        | 0,021 | -53,13       | 0,12683 |
| <i>Clostridium</i>               | 0,013  | 0,010 | 0,003        | 0,002 | -77,65       | 0,34955 |
| <i>Coprococcus</i>               | 0,055  | 0,008 | 0,027        | 0,004 | -51,57       | 0,00687 |
| <i>Dorea</i>                     | 0,218  | 0,030 | 0,140        | 0,018 | -35,64       | 0,03896 |
| <i>Enterorhabdus</i>             | 0,000  | 0,000 | 0,001        | 0,001 | IEC MyD88-KO | 0,33056 |
| <i>Lactobacillus</i>             | 0,120  | 0,029 | 0,065        | 0,021 | -46,32       | 0,14159 |
| <i>Lactococcus</i>               | 0,001  | 0,001 | 0,003        | 0,002 | 363,00       | 0,34235 |
| <i>Lactonifactor</i>             | 0,001  | 0,001 | 0,000        | 0,000 | WT           | 0,33056 |
| <i>Lawsonia</i>                  | 0,241  | 0,040 | 0,211        | 0,034 | -12,26       | 0,57891 |
| <i>Marvinbryantia</i>            | 0,025  | 0,011 | 0,004        | 0,003 | -84,17       | 0,08241 |
| <i>Mucispirillum</i>             | 5,617  | 0,845 | 5,249        | 0,895 | -6,56        | 0,76811 |
| <i>Odoribacter</i>               | 4,172  | 0,464 | 4,160        | 0,509 | -0,29        | 0,98619 |
| <i>Olsenella</i>                 | 0,098  | 0,057 | 0,285        | 0,141 | 191,05       | 0,23413 |
| <i>Oscillibacter</i>             | 10,097 | 0,982 | 7,779        | 0,394 | -22,96       | 0,04194 |
| <i>Parabacteroides</i>           | 0,281  | 0,044 | 0,255        | 0,037 | -9,26        | 0,65742 |
| <i>Parasutterella</i>            | 1,528  | 0,731 | 1,627        | 0,521 | 6,47         | 0,91354 |
| <i>Prevotella</i>                | 0,015  | 0,013 | 0,000        | 0,000 | WT           | 0,25929 |
| <i>Rikenella</i>                 | 0,001  | 0,001 | 0,000        | 0,000 | WT           | 0,33056 |
| <i>Robinsoniella</i>             | 0,001  | 0,001 | 0,000        | 0,000 | WT           | 0,15335 |
| <i>Roseburia</i>                 | 0,003  | 0,001 | 0,001        | 0,001 | -57,34       | 0,27252 |
| <i>Streptococcus</i>             | 0,002  | 0,001 | 0,000        | 0,000 | WT           | 0,15605 |
| <i>Streptophyta</i>              | 0,002  | 0,002 | 0,001        | 0,001 | -42,48       | 0,65350 |
| <i>Syntrophococcus</i>           | 0,016  | 0,005 | 0,012        | 0,004 | -25,19       | 0,53447 |
| <i>TM7_genera_incertae_sedis</i> | 0,070  | 0,015 | 0,057        | 0,014 | -18,97       | 0,52643 |
| <i>u "Bacteroidales"</i>         | 4,005  | 0,431 | 5,510        | 0,376 | 37,56        | 0,01702 |
| <i>u "Bacteroidetes"</i>         | 1,519  | 0,226 | 1,733        | 0,133 | 14,06        | 0,42615 |
| <i>u "Clostridia"</i>            | 0,362  | 0,057 | 0,242        | 0,050 | -32,99       | 0,13418 |
| <i>u "Firmicutes"</i>            | 1,958  | 0,147 | 1,722        | 0,234 | -12,06       | 0,40432 |
| <i>u "Lachnospiraceae"</i>       | 22,287 | 1,432 | 20,217       | 1,762 | -9,29        | 0,37392 |
| <i>u "Porphyromonadaceae"</i>    | 7,245  | 1,305 | 10,440       | 0,940 | 44,10        | 0,06238 |
| <i>u "Prevotellaceae"</i>        | 0,001  | 0,001 | 0,000        | 0,000 | WT           | 0,33056 |
| <i>u "Proteobacteria"</i>        | 0,124  | 0,054 | 0,174        | 0,045 | 40,03        | 0,48661 |
| <i>u "Rikenellaceae"</i>         | 0,005  | 0,002 | 0,004        | 0,002 | -23,75       | 0,67833 |
| <i>u "Ruminococcaceae"</i>       | 7,150  | 0,530 | 5,703        | 0,413 | -20,23       | 0,04511 |
| <i>u Alphaproteobacteria</i>     | 0,247  | 0,113 | 0,320        | 0,082 | 29,58        | 0,60587 |
| <i>u Bacteria</i>                | 2,392  | 0,120 | 2,099        | 0,178 | -12,27       | 0,18891 |
| <i>u Burkholderiales</i>         | 0,000  | 0,000 | 0,002        | 0,001 | IEC MyD88-KO | 0,15575 |
| <i>u Clostridiales</i>           | 4,768  | 0,464 | 4,220        | 0,487 | -11,50       | 0,42589 |
| <i>u Coriobacteriaceae</i>       | 0,024  | 0,016 | 0,046        | 0,016 | 89,13        | 0,35231 |
| <i>u Desulfovibrionaceae</i>     | 4,989  | 0,615 | 4,451        | 0,587 | -10,79       | 0,53441 |
| <i>u Desulfovibrionales</i>      | 0,001  | 0,001 | 0,003        | 0,002 | 226,32       | 0,27844 |
| <i>u Erysipelotrichaceae</i>     | 0,608  | 0,175 | 0,652        | 0,070 | 7,27         | 0,81745 |
| <i>u Mollicutes</i>              | 0,001  | 0,001 | 0,000        | 0,000 | WT           | 0,16487 |

|                          |       |       |       |       |       |                |
|--------------------------|-------|-------|-------|-------|-------|----------------|
| <b>Unclassified</b>      | 0,498 | 0,066 | 0,574 | 0,045 | 15,14 | 0,35580        |
| <b>u "Bacteroidales"</b> | 4,005 | 0,431 | 5,510 | 0,376 | 37,56 | <b>0,01702</b> |

All the genera detected by pyrosequencing are presented in the tables. Indication WT, IEC MyD88-KO, WT HFD or IEC MyD88-KO HFD in the column 'changes (%)' corresponds to the group of mice for which the given phylotype was found exclusively. P-values are based on Student *t*-test. u=unclassified. Significant P-values ( $\leq 0.05$ ) are indicated in red. FDR: non-significant.

|                                  | WT     |       | WT HFD |       | changes (%) | p-value  |
|----------------------------------|--------|-------|--------|-------|-------------|----------|
|                                  | Mean   | SEM   | Mean   | SEM   |             |          |
| <i>Alistipes</i>                 | 11,374 | 1,192 | 16,329 | 1,694 | 43,56       | 0,02789  |
| <i>Allobaculum</i>               | 3,292  | 0,957 | 0,151  | 0,079 | -95,42      | 0,00425* |
| <i>Anaeroplasma</i>              | 2,151  | 0,442 | 0,013  | 0,007 | -99,40      | 0,00013* |
| <i>Anaerostipes</i>              | 0,001  | 0,001 | 0,000  | 0,000 | WT          | 0,16487  |
| <i>Anaerotruncus</i>             | 0,742  | 0,100 | 0,437  | 0,047 | -41,16      | 0,01259  |
| <i>Anaerovorax</i>               | 0,109  | 0,028 | 0,041  | 0,005 | -62,61      | 0,03006  |
| <i>Asaccharobacter</i>           | 0,013  | 0,006 | 0,006  | 0,004 | -50,78      | 0,37722  |
| <i>Bacteroides</i>               | 1,318  | 0,169 | 2,024  | 0,213 | 53,58       | 0,01819  |
| <i>Barnesiella</i>               | 0,004  | 0,002 | 0,000  | 0,000 | WT          | 0,05274  |
| <i>Blautia</i>                   | 0,001  | 0,001 | 0,001  | 0,001 | -0,42       | 0,99765  |
| <i>Butyricoccus</i>              | 0,046  | 0,007 | 0,089  | 0,010 | 90,81       | 0,00250* |
| <i>Butyrivibrio</i>              | 0,186  | 0,058 | 0,033  | 0,013 | -82,18      | 0,01970  |
| <i>Clostridium</i>               | 0,013  | 0,010 | 0,000  | 0,000 | WT          | 0,22358  |
| <i>Coprococcus</i>               | 0,055  | 0,008 | 0,038  | 0,010 | -31,39      | 0,19430  |
| <i>Dorea</i>                     | 0,218  | 0,030 | 0,078  | 0,028 | -64,16      | 0,00296* |
| <i>Enterorhabdus</i>             | 0,000  | 0,000 | 0,001  | 0,001 | WT HFD      | 0,33056  |
| <i>Escherichia/Shigella</i>      | 0,000  | 0,000 | 0,007  | 0,003 | WT HFD      | 0,02626  |
| <i>Hydrogenoanaerobacterium</i>  | 0,000  | 0,000 | 0,001  | 0,001 | WT HFD      | 0,33056  |
| <i>Lactobacillus</i>             | 0,120  | 0,029 | 0,029  | 0,011 | -75,75      | 0,00963* |
| <i>Lactococcus</i>               | 0,001  | 0,001 | 0,005  | 0,002 | 865,21      | 0,05097  |
| <i>Lactonifactor</i>             | 0,001  | 0,001 | 0,002  | 0,001 | 260,89      | 0,23772  |
| <i>Lawsonia</i>                  | 0,241  | 0,040 | 0,374  | 0,043 | 55,19       | 0,03570  |
| <i>Marvinbryantia</i>            | 0,025  | 0,011 | 0,003  | 0,002 | -89,83      | 0,05905  |
| <i>Mucispirillum</i>             | 5,617  | 0,845 | 1,943  | 0,390 | -65,41      | 0,00094* |
| <i>Odoribacter</i>               | 4,172  | 0,464 | 2,672  | 0,474 | -35,96      | 0,03644  |
| <i>Olsenella</i>                 | 0,098  | 0,057 | 0,014  | 0,009 | -85,96      | 0,16086  |
| <i>Oscillibacter</i>             | 10,097 | 0,982 | 12,931 | 0,600 | 28,07       | 0,02415  |
| <i>Parabacteroides</i>           | 0,281  | 0,044 | 0,245  | 0,048 | -12,78      | 0,58903  |
| <i>Parasutterella</i>            | 1,528  | 0,731 | 0,063  | 0,051 | -95,85      | 0,06092  |
| <i>Prevotella</i>                | 0,015  | 0,013 | 0,046  | 0,018 | 202,63      | 0,18335  |
| <i>Rikenella</i>                 | 0,001  | 0,001 | 0,000  | 0,000 | WT          | 0,33056  |
| <i>Robinsoniella</i>             | 0,001  | 0,001 | 0,000  | 0,000 | WT          | 0,15335  |
| <i>Roseburia</i>                 | 0,003  | 0,001 | 0,000  | 0,000 | WT          | 0,02822  |
| <i>Sporacetigenium</i>           | 0,000  | 0,000 | 0,028  | 0,010 | WT HFD      | 0,01161  |
| <i>Streptococcus</i>             | 0,002  | 0,001 | 0,001  | 0,001 | -61,95      | 0,43463  |
| <i>Streptophyta</i>              | 0,002  | 0,002 | 0,011  | 0,007 | 378,28      | 0,26689  |
| <i>Syntrophococcus</i>           | 0,016  | 0,005 | 0,010  | 0,004 | -34,57      | 0,36835  |
| <i>TM7_genera_incertae_sedis</i> | 0,070  | 0,015 | 0,033  | 0,010 | -52,36      | 0,05468  |
| <i>u "Bacteroidales"</i>         | 4,005  | 0,431 | 3,874  | 0,453 | -3,29       | 0,83570  |
| <i>u "Bacteroidetes"</i>         | 1,519  | 0,226 | 1,227  | 0,129 | -19,22      | 0,27691  |
| <i>u "Clostridia"</i>            | 0,362  | 0,057 | 0,126  | 0,024 | -65,12      | 0,00130* |
| <i>u "Firmicutes"</i>            | 1,958  | 0,147 | 2,443  | 0,388 | 24,77       | 0,25767  |
| <i>u "Lachnospiraceae"</i>       | 22,287 | 1,432 | 25,450 | 2,416 | 14,19       | 0,27491  |
| <i>u "Porphyromonadaceae"</i>    | 7,245  | 1,305 | 2,823  | 0,263 | -61,03      | 0,00379* |
| <i>u "Prevotellaceae"</i>        | 0,001  | 0,001 | 0,005  | 0,003 | 377,64      | 0,21316  |
| <i>u "Proteobacteria"</i>        | 0,124  | 0,054 | 0,023  | 0,009 | -81,90      | 0,07839  |
| <i>u "Rikenellaceae"</i>         | 0,005  | 0,002 | 0,003  | 0,002 | -36,95      | 0,54513  |
| <i>u "Ruminococcaceae"</i>       | 7,150  | 0,530 | 10,249 | 0,680 | 43,36       | 0,00207* |
| <i>u Alphaproteobacteria</i>     | 0,247  | 0,113 | 0,046  | 0,019 | -81,36      | 0,09536  |
| <i>u Bacteria</i>                | 2,392  | 0,120 | 2,363  | 0,248 | -1,23       | 0,91607  |
| <i>u Clostridiales</i>           | 4,768  | 0,464 | 4,925  | 0,280 | 3,29        | 0,77567  |
| <i>u Coriobacteriaceae</i>       | 0,024  | 0,016 | 0,018  | 0,006 | -24,38      | 0,73570  |
| <i>u Desulfovibrionaceae</i>     | 4,989  | 0,615 | 8,239  | 0,554 | 65,12       | 0,00099* |
| <i>u Desulfovibrionales</i>      | 0,001  | 0,001 | 0,001  | 0,001 | 31,51       | 0,81634  |
| <i>u Erysipelotrichaceae</i>     | 0,608  | 0,175 | 0,036  | 0,016 | -94,06      | 0,00447* |
| <i>u Mollicutes</i>              | 0,001  | 0,001 | 0,001  | 0,001 | -41,90      | 0,64804  |

|                     |       |       |       |       |       |         |
|---------------------|-------|-------|-------|-------|-------|---------|
| <b>Unclassified</b> | 0,498 | 0,066 | 0,478 | 0,040 | -4,14 | 0,79147 |
|---------------------|-------|-------|-------|-------|-------|---------|

---

All the genera detected by pyrosequencing are presented in the tables. Indication WT, IEC MyD88-KO, WT HFD or IEC MyD88-KO HFD in the column 'changes (%)' corresponds to the group of mice for which the given phylotype was found exclusively. P-values are based on Student *t*-test. u=unclassified. Significant P-values ( $\leq 0.05$  are indicated in red).  
\*: significant p-values after FDR correction.

| IEC MyD88-KO                     |        |       |        |       |                  |         |
|----------------------------------|--------|-------|--------|-------|------------------|---------|
|                                  | WT HFD |       | HFD    |       | changes (%)      | p-value |
|                                  | Mean   | SEM   | Mean   | SEM   |                  |         |
| <i>Alistipes</i>                 | 16,329 | 1,694 | 18,589 | 1,363 | 13,84            | 0,31245 |
| <i>Allobaculum</i>               | 0,151  | 0,079 | 0,916  | 0,269 | 507,80           | 0,01373 |
| <i>Anaeroplasma</i>              | 0,013  | 0,007 | 0,142  | 0,072 | 996,67           | 0,09163 |
| <i>Anaerotruncus</i>             | 0,437  | 0,047 | 0,257  | 0,043 | -41,26           | 0,01094 |
| <i>Anaerovorax</i>               | 0,041  | 0,005 | 0,081  | 0,017 | 97,96            | 0,03597 |
| <i>Asaccharobacter</i>           | 0,006  | 0,004 | 0,013  | 0,006 | 109,78           | 0,34893 |
| <i>Bacteroides</i>               | 2,024  | 0,213 | 3,235  | 0,524 | 59,84            | 0,04638 |
| <i>Blautia</i>                   | 0,001  | 0,001 | 0,000  | 0,000 | WT HFD           | 0,33056 |
| <i>Butyrivibrio</i>              | 0,089  | 0,010 | 0,056  | 0,014 | -36,70           | 0,06957 |
| <i>Butyrivibrio</i>              | 0,033  | 0,013 | 0,026  | 0,008 | -22,51           | 0,63422 |
| <i>Clostridium</i>               | 0,000  | 0,000 | 0,010  | 0,005 | IEC MyD88-KO HFD | 0,05148 |
| <i>Coprococcus</i>               | 0,038  | 0,010 | 0,024  | 0,007 | -37,57           | 0,25336 |
| <i>Dorea</i>                     | 0,078  | 0,028 | 0,051  | 0,015 | -34,71           | 0,39969 |
| <i>Enterorhabdus</i>             | 0,001  | 0,001 | 0,000  | 0,000 | WT HFD           | 0,33056 |
| <i>Escherichia/Shigella</i>      | 0,007  | 0,003 | 0,011  | 0,007 | 62,54            | 0,58657 |
| <i>Hydrogenoanaerobacterium</i>  | 0,001  | 0,001 | 0,000  | 0,000 | WT HFD           | 0,33056 |
| <i>Lactobacillus</i>             | 0,029  | 0,011 | 0,068  | 0,019 | 133,91           | 0,09718 |
| <i>Lactococcus</i>               | 0,005  | 0,002 | 0,007  | 0,002 | 29,46            | 0,60137 |
| <i>Lactonifactor</i>             | 0,002  | 0,001 | 0,002  | 0,002 | -19,91           | 0,83743 |
| <i>Lawsonia</i>                  | 0,374  | 0,043 | 0,319  | 0,053 | -14,69           | 0,42958 |
| <i>Marvinbryantia</i>            | 0,003  | 0,002 | 0,000  | 0,000 | WT HFD           | 0,16043 |
| <i>Mucispirillum</i>             | 1,943  | 0,390 | 1,706  | 0,209 | -12,17           | 0,59918 |
| <i>Odoribacter</i>               | 2,672  | 0,474 | 3,382  | 0,340 | 26,57            | 0,23954 |
| <i>Olsenella</i>                 | 0,014  | 0,009 | 0,645  | 0,343 | 4593,30          | 0,08225 |
| <i>Oscillibacter</i>             | 12,931 | 0,600 | 10,788 | 0,862 | -16,57           | 0,05621 |
| <i>Parabacteroides</i>           | 0,245  | 0,048 | 0,230  | 0,057 | -6,20            | 0,84128 |
| <i>Parasutterella</i>            | 0,063  | 0,051 | 0,117  | 0,064 | 84,85            | 0,51937 |
| <i>Prevotella</i>                | 0,046  | 0,018 | 0,025  | 0,011 | -45,20           | 0,33386 |
| <i>Sporacetigenium</i>           | 0,028  | 0,010 | 0,102  | 0,052 | 261,55           | 0,17634 |
| <i>Streptococcus</i>             | 0,001  | 0,001 | 0,001  | 0,001 | 88,12            | 0,68404 |
| <i>Streptophyta</i>              | 0,011  | 0,007 | 0,026  | 0,023 | 131,95           | 0,55076 |
| <i>Syntrophococcus</i>           | 0,010  | 0,004 | 0,009  | 0,004 | -9,58            | 0,85312 |
| <i>TM7_genera_incertae_sedis</i> | 0,033  | 0,010 | 0,066  | 0,041 | 99,46            | 0,44034 |
| <i>u "Bacteroidales"</i>         | 3,874  | 0,453 | 4,756  | 0,428 | 22,76            | 0,17453 |
| <i>u "Bacteroidetes"</i>         | 1,227  | 0,129 | 1,271  | 0,111 | 3,61             | 0,79786 |
| <i>u "Clostridia"</i>            | 0,126  | 0,024 | 0,066  | 0,009 | -48,09           | 0,02826 |
| <i>u "Firmicutes"</i>            | 2,443  | 0,388 | 1,154  | 0,124 | -52,75           | 0,00540 |
| <i>u "Lachnospiraceae"</i>       | 25,450 | 2,416 | 24,414 | 1,729 | -4,07            | 0,73151 |
| <i>u "Porphyromonadaceae"</i>    | 2,823  | 0,263 | 3,402  | 0,320 | 20,50            | 0,17933 |
| <i>u "Prevotellaceae"</i>        | 0,005  | 0,003 | 0,001  | 0,001 | -85,30           | 0,16828 |
| <i>u "Proteobacteria"</i>        | 0,023  | 0,009 | 0,030  | 0,010 | 34,50            | 0,56704 |
| <i>u "Rikenellaceae"</i>         | 0,003  | 0,002 | 0,004  | 0,002 | 21,44            | 0,80630 |
| <i>u "Ruminococcaceae"</i>       | 10,249 | 0,680 | 8,015  | 0,742 | -21,80           | 0,03947 |
| <i>u Alphaproteobacteria</i>     | 0,046  | 0,019 | 0,030  | 0,012 | -34,00           | 0,49409 |
| <i>u Bacteria</i>                | 2,363  | 0,248 | 2,389  | 0,232 | 1,13             | 0,93839 |
| <i>u Clostridiales</i>           | 4,925  | 0,280 | 4,710  | 0,447 | -4,37            | 0,68821 |
| <i>u Coriobacteriaceae</i>       | 0,018  | 0,006 | 0,054  | 0,023 | 196,91           | 0,15296 |
| <i>u Desulfovibrionaceae</i>     | 8,239  | 0,554 | 8,054  | 0,763 | -2,24            | 0,84701 |
| <i>u Desulfovibrionales</i>      | 0,001  | 0,001 | 0,001  | 0,001 | 15,20            | 0,88838 |
| <i>u Erysipelotrichaceae</i>     | 0,036  | 0,016 | 0,205  | 0,065 | 468,48           | 0,02080 |
| <i>u Mollicutes</i>              | 0,001  | 0,001 | 0,001  | 0,001 | -17,79           | 0,89222 |
| <i>Unclassified</i>              | 0,478  | 0,040 | 0,513  | 0,052 | 7,32             | 0,60271 |

All the genera detected by pyrosequencing are presented in the tables. Indication WT, IEC MyD88-KO, WT HFD or IEC MyD88-KO HFD in the column 'changes (%)' corresponds to the group of mice for which the given phylotype was found exclusively. P-values are based on Student t-test. u=unclassified. Significant P-values ( $\leq 0.05$ ) are indicated in red. FDR: non-significant.

Supplementary Table 4: Primers sequences

| Primers         | Forward Sequence            | Reverse Sequence           |
|-----------------|-----------------------------|----------------------------|
| <i>RPL-19</i>   | GAAGGTCAAAGGGAATGTGTTCA     | CCTGTTGCTCACTTGT           |
| <i>CD11c</i>    | ACGTCACTACAAGGAGATGTTGGA    | ATCCTATTGCAGAATGCTTCTTTACC |
| <i>MCP1</i>     | GCAGTTAACGCCCACTCA          | CCCAGCCTACTCATTGGGATCA     |
| <i>CB1</i>      | CTGATGTTCTGGATCGGAGTC       | TCTGAGGTGTGAATGATGATGC     |
| <i>GPR119</i>   | AGCTCTGCTCAGCACACACAG       | GAATGCCATCCGAAGGCTAC       |
| <i>Reg3g</i>    | TTCCTGTCTCCATGATCAAA        | CATCCACCTCTGTTGGGTTT       |
| <i>Lyz1</i>     | GCCAAGGTCTACAATCGTTGTGAGTTG | CAGTCAGCCAGCTTGACACCACG    |
| <i>Pla2g2a</i>  | AGGATTCCCCAAGGATGCCAC       | CAGCCGTTTCTGACAGGAGTTCTGG  |
| <i>Defa</i>     | GGTGATCATCAGACCCAGCATCAGT   | AAGAGACTAAAAGTGGAGCAGC     |
| <i>Ang 4</i>    | CTCTGGCTCAGAATGTAAGGTACGA   | GAAATCTTTAAAGGCTCGGTACCC   |
| <i>Foxp3</i>    | TCCTCCCAGAGTTCTTCCA         | CGAACATGCGAGTAAACCAA       |
| <i>Myd88</i>    | CGGAACCTTTTCGATGCCTTT       | TAGTTGCCGGATCATCTCCT       |
| <i>PPARg</i>    | CTGCTCAAGTATGGTGTCCATGA     | TGAGATGAGGACTCCATCTTTATTCA |
| <i>FIAF</i>     | CAATGCCAAATTGCTCCAATT       | TGGCCGTGGGCTCAGT           |
| <i>IL18</i>     | ACAACTTTGGCCGACTTCAC        | CTGGGGTTCACTGGCACTTT       |
| <i>IL1b</i>     | TCGCTCAGGGTCACAAGAAA        | CATCAGAGGCAAGGAGGAAAAC     |
| <i>TRAF</i>     | TGGCATTCTACCATCCTTT         | TCGGAAGGCTTCATATGCTC       |
| <i>Tjp1</i>     | TTTTTGACAGGGGGAGTGG         | TGCTGCAGAGGTCAAAGTTCAAG    |
| <i>Claudin2</i> | AAGGTGCTGCTGAGGGTAGA        | AGTGGCAGAGATGGGATTTG       |
| <i>Occludin</i> | ATGTCCGGCCGATGCTCTC         | TTTGCTGCTCTTGGGTCTGTAT     |
